# Supplementary figures and images for: Anatomic and functional leg-length inequality: A review and recommendation for clinical decision-making. Part I, anatomic leg-length inequality: prevalence, magnitude, effects and clinical significance
Source: Springer Nature journal article supplement (doi:10.1186/1746-1340-13-11), 2005-07-20

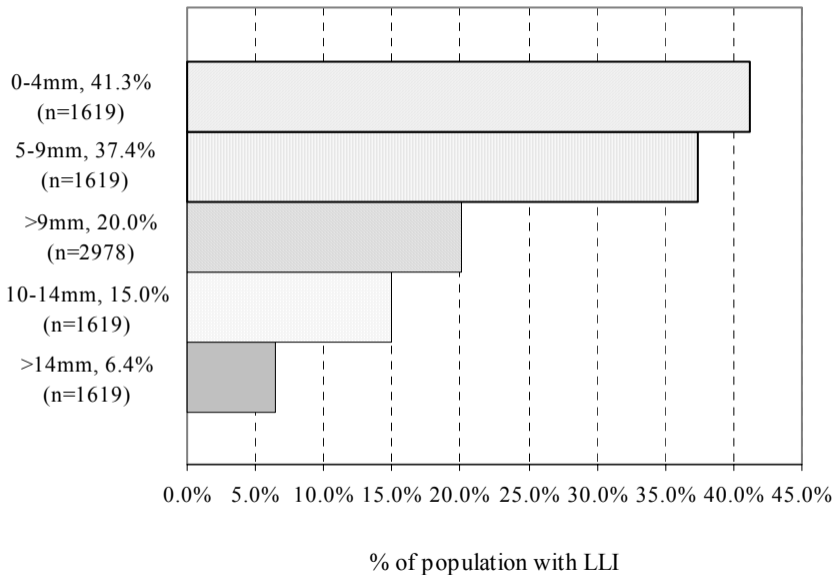

Supplement: 12998_2005_11_MOESM3_ESM.pdf [file 12998_2005_11_MOESM3_ESM.pdf]
